# Supplementary material for: Prevalence of Hepatocellular Carcinoma in Hepatitis B Population within Southeast Asia: A Systematic Review and Meta-Analysis of 39,050 Participants
Source: MDPI journal article supplement (doi:10.3390/pathogens12101220), 2023-10-06

# MALE

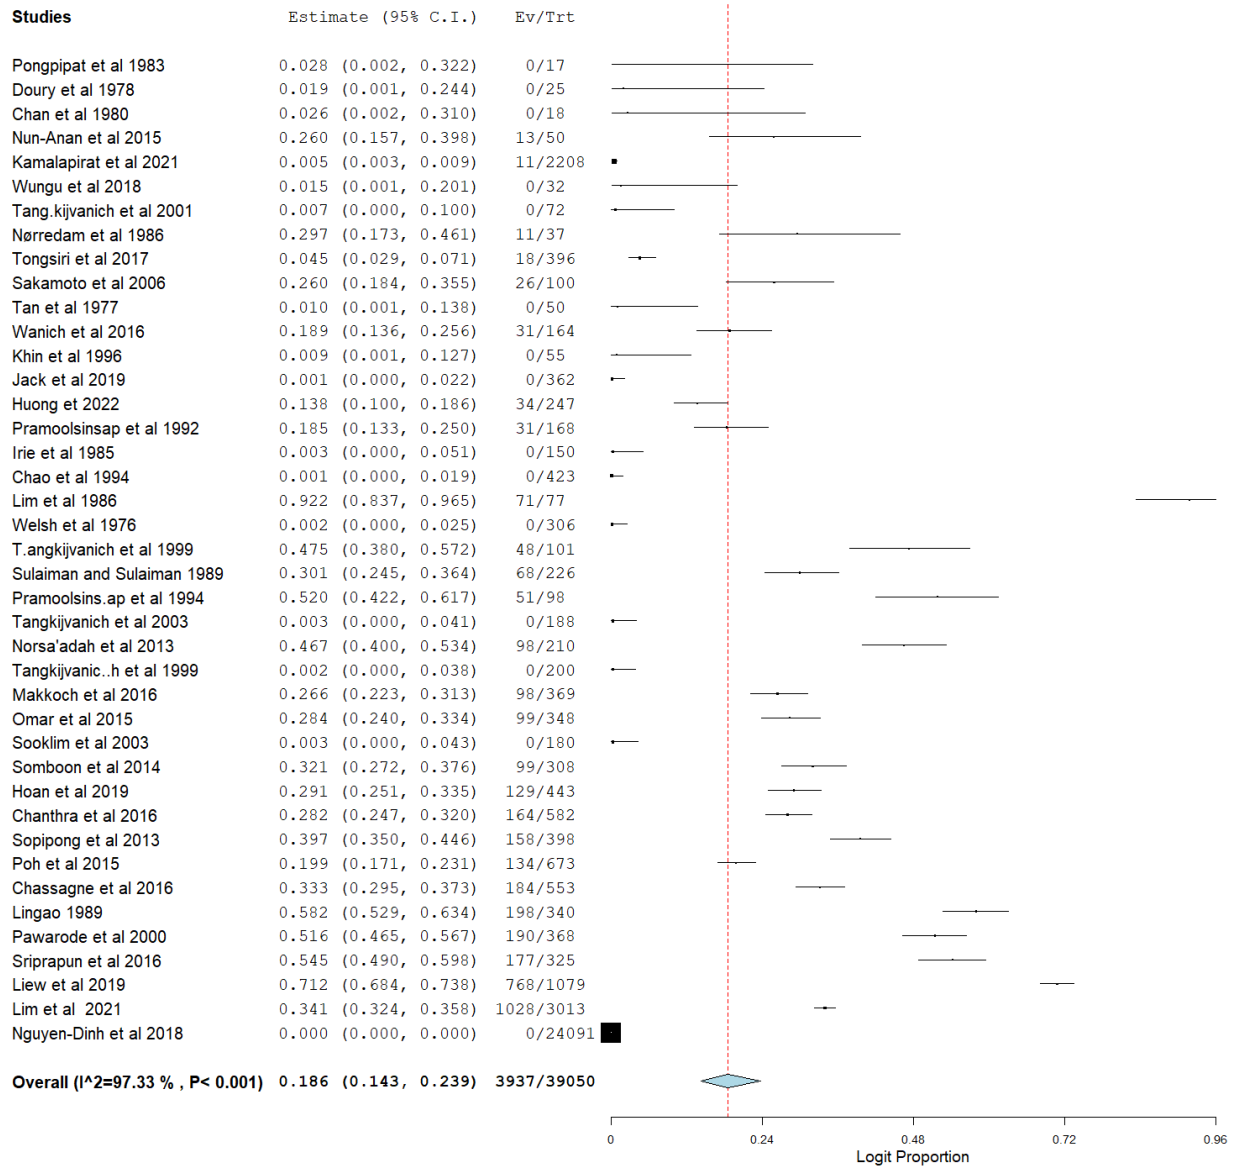

## FEMALE

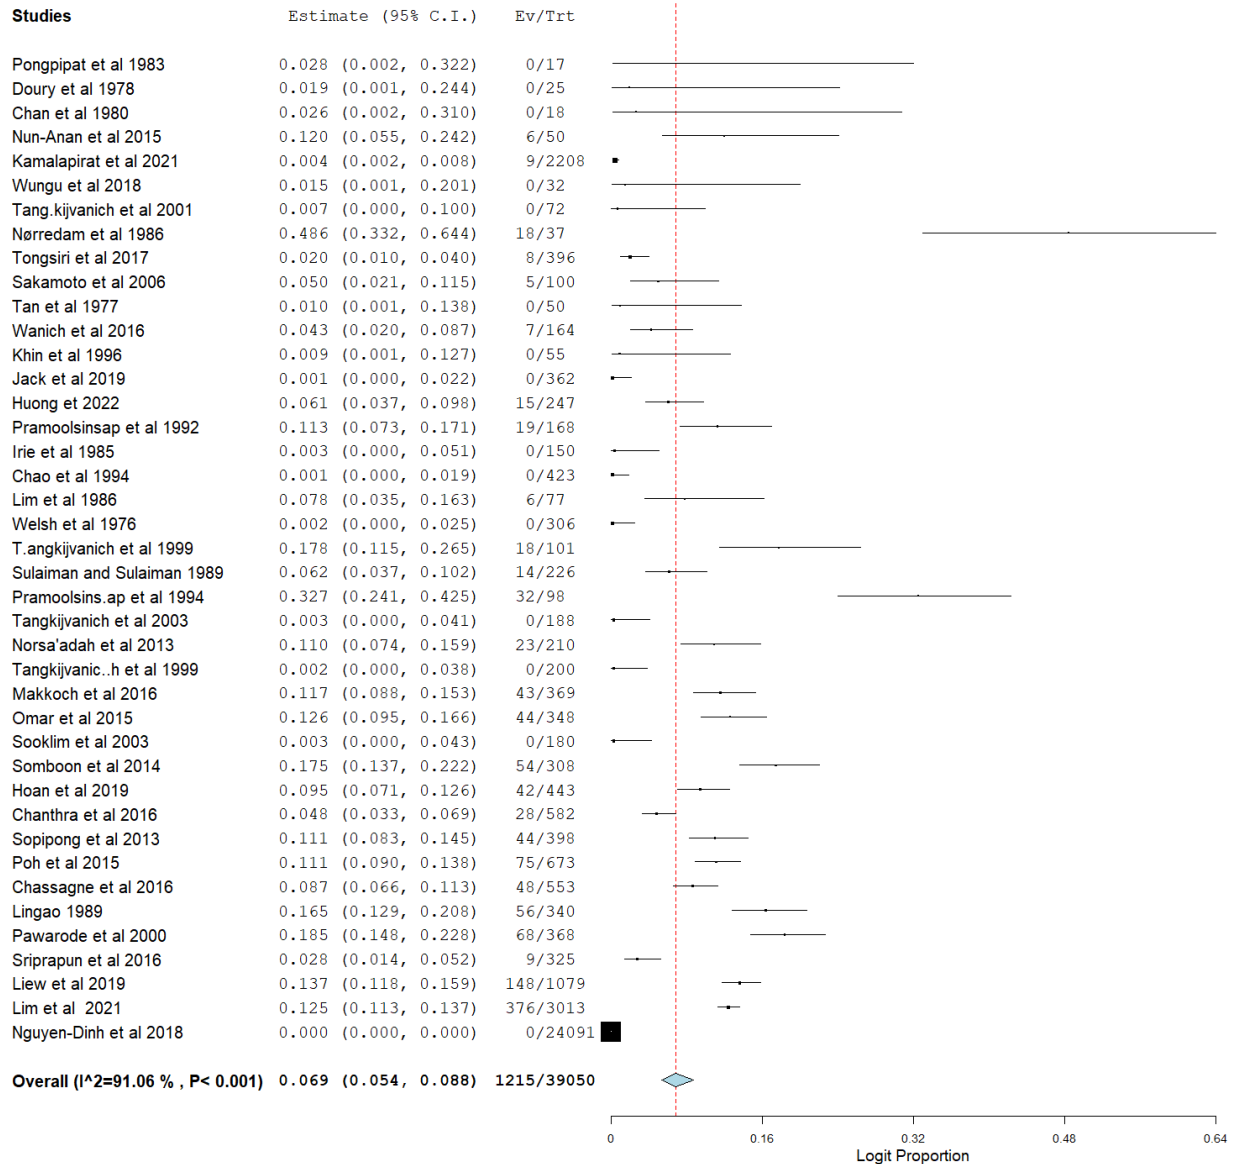

## GENOTYPE A

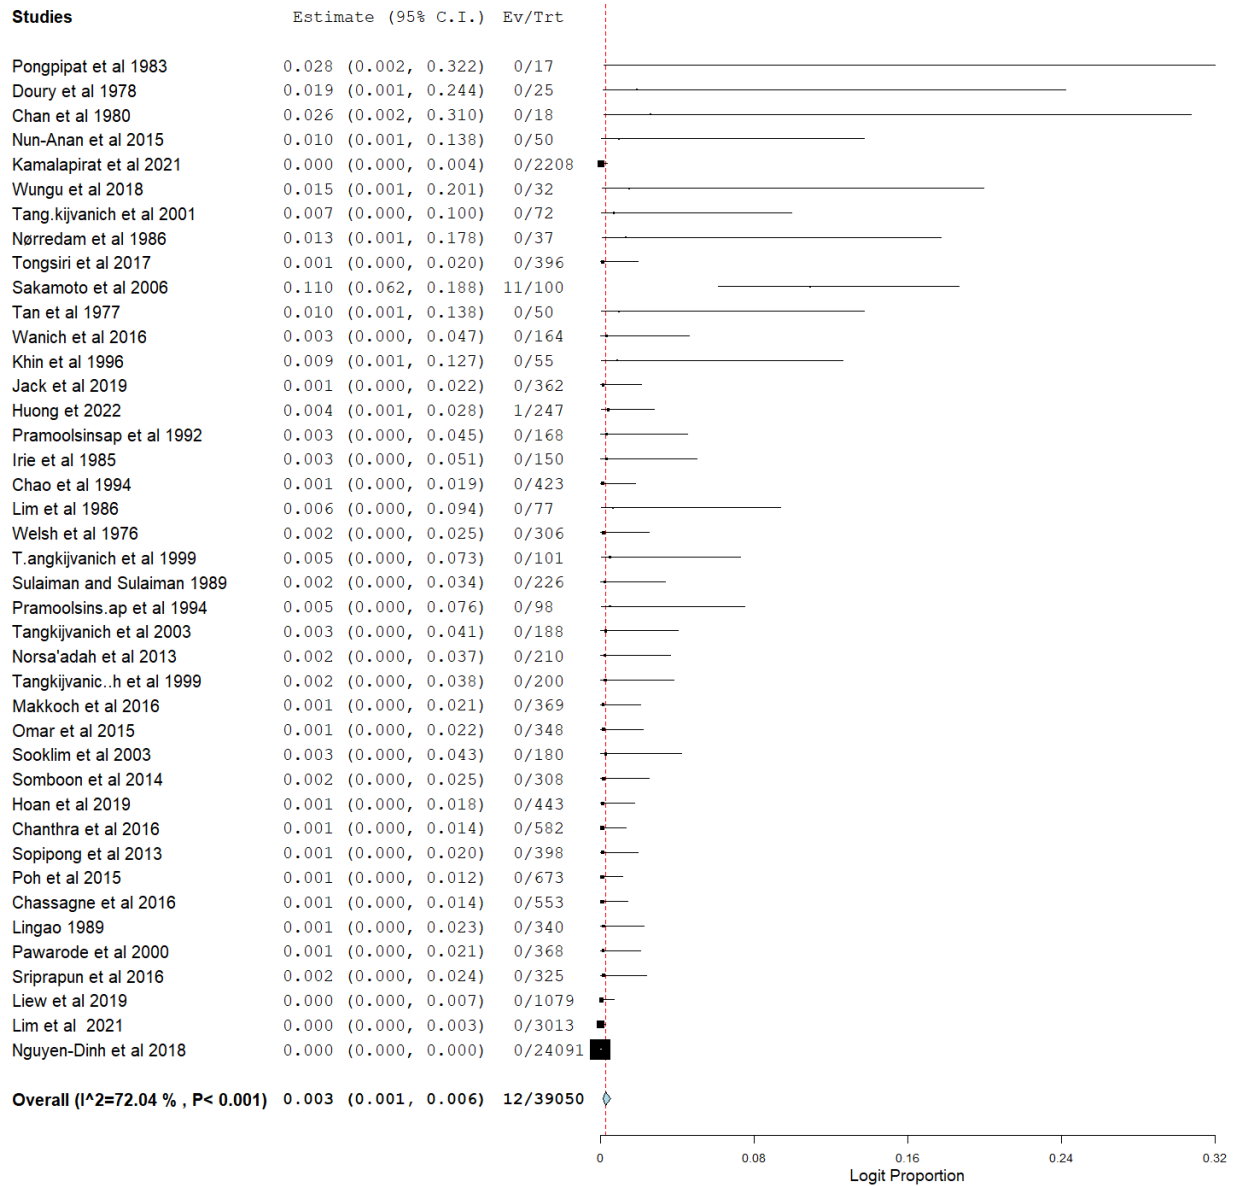

## GENOTYPE B

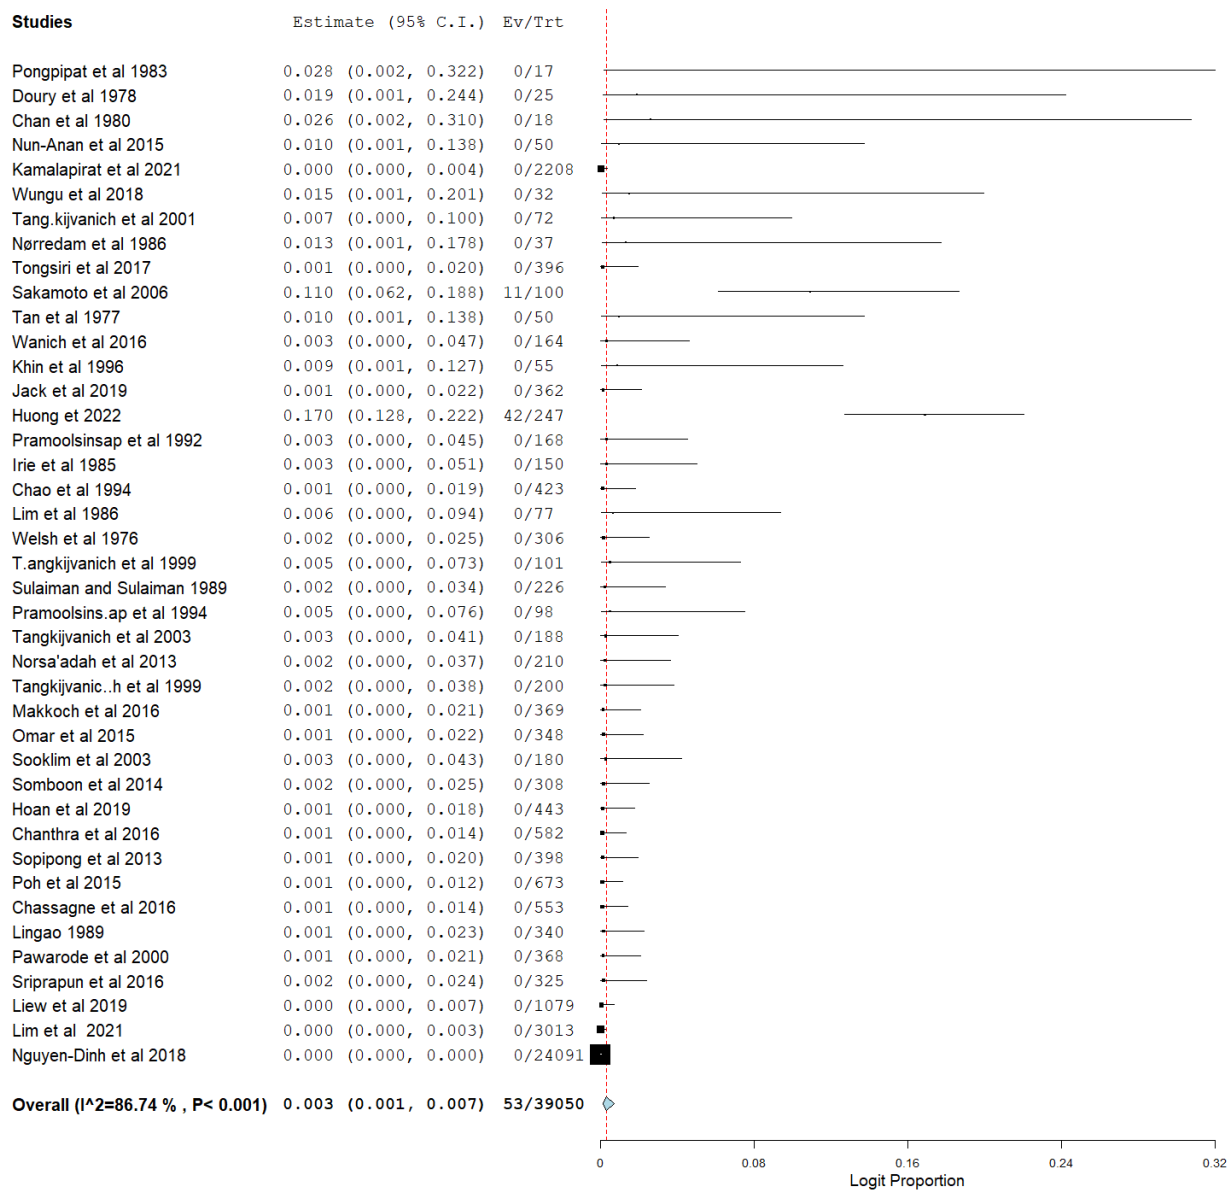

## GENOTYPE C

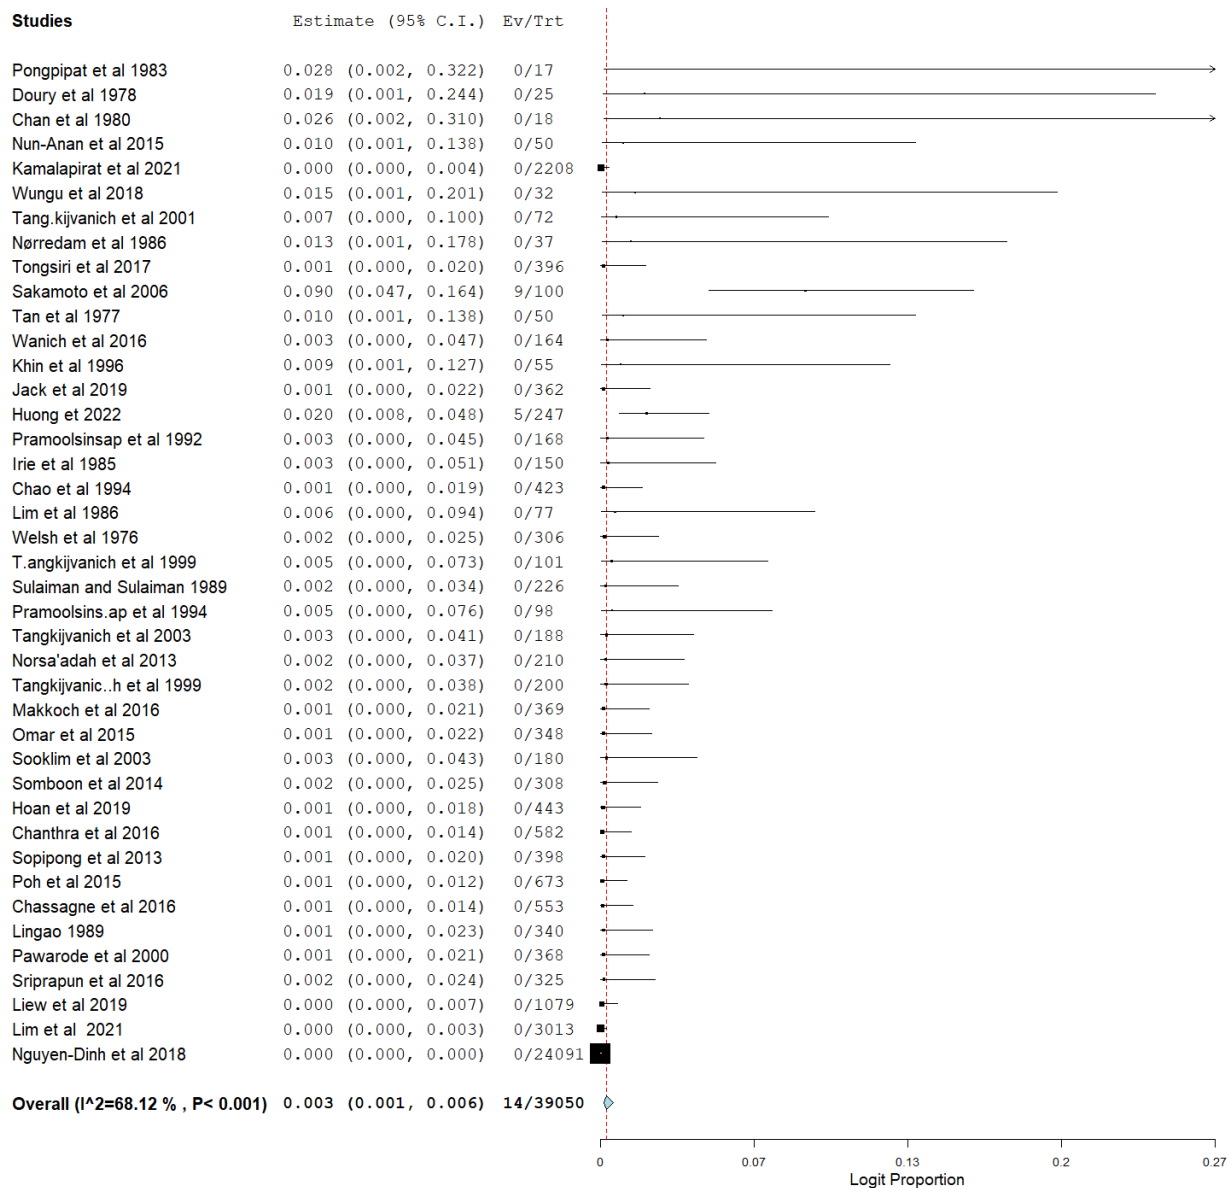

## EARLY

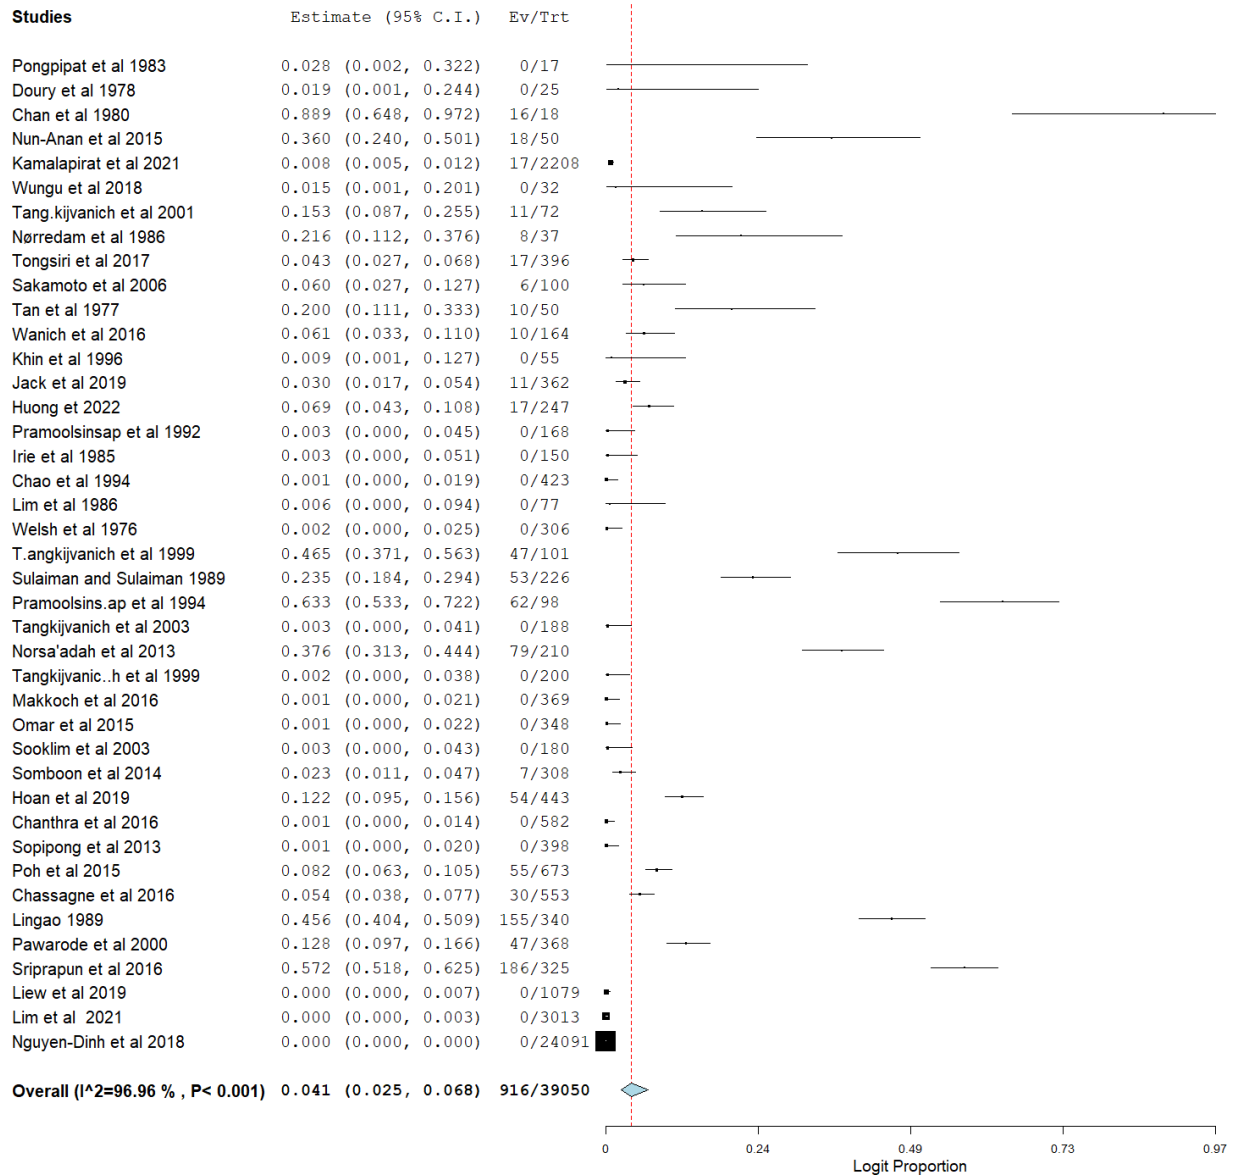

## INTERMEDIATE

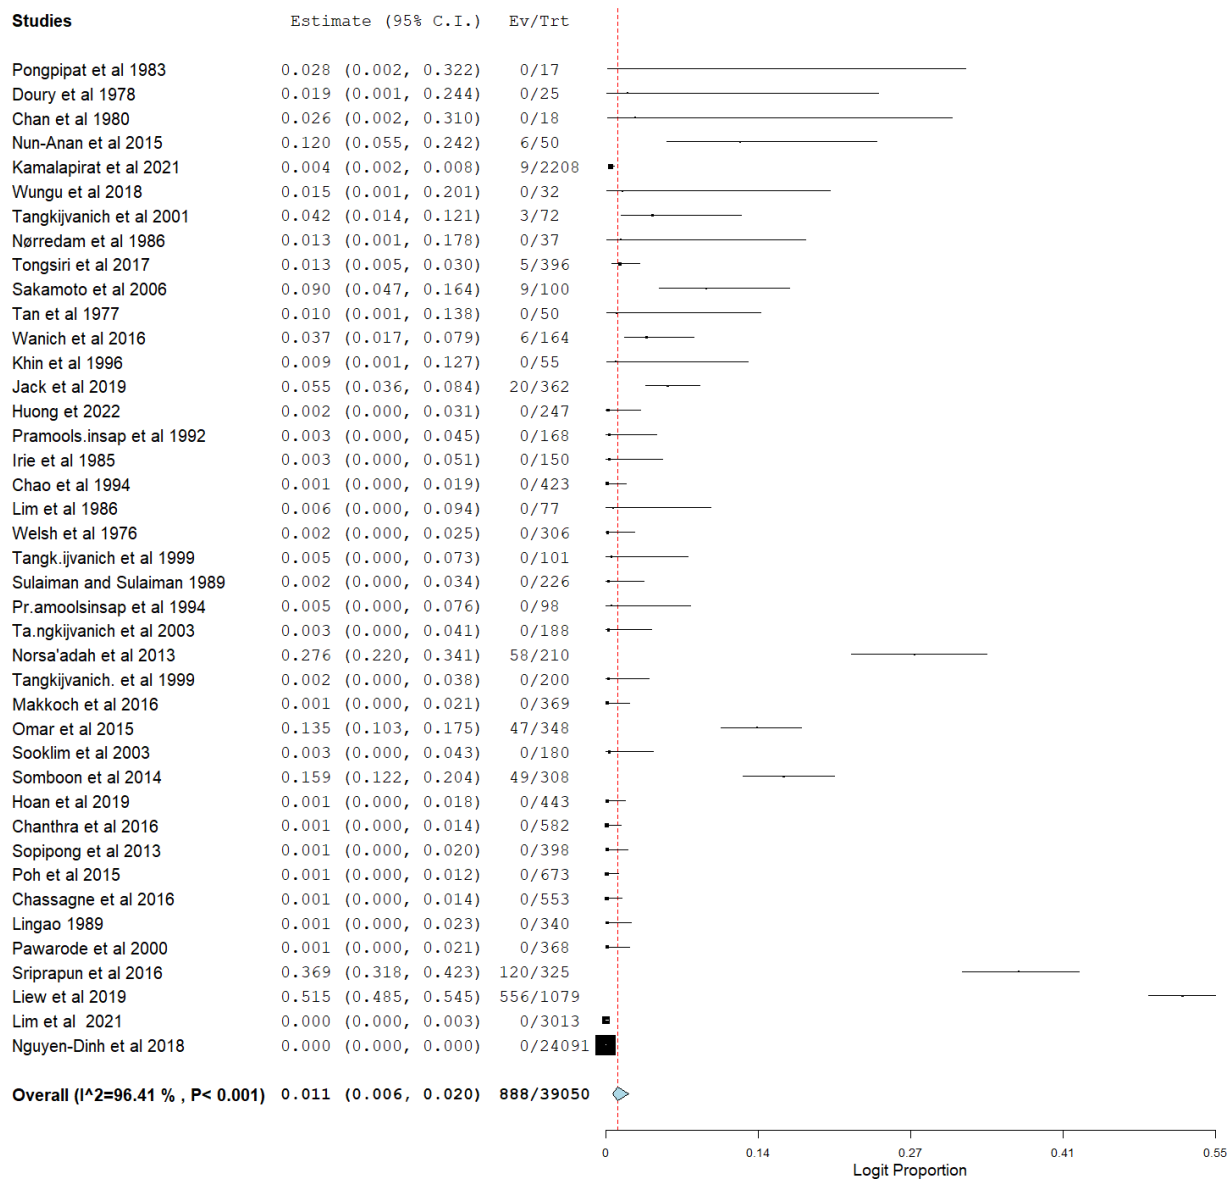

# LATE

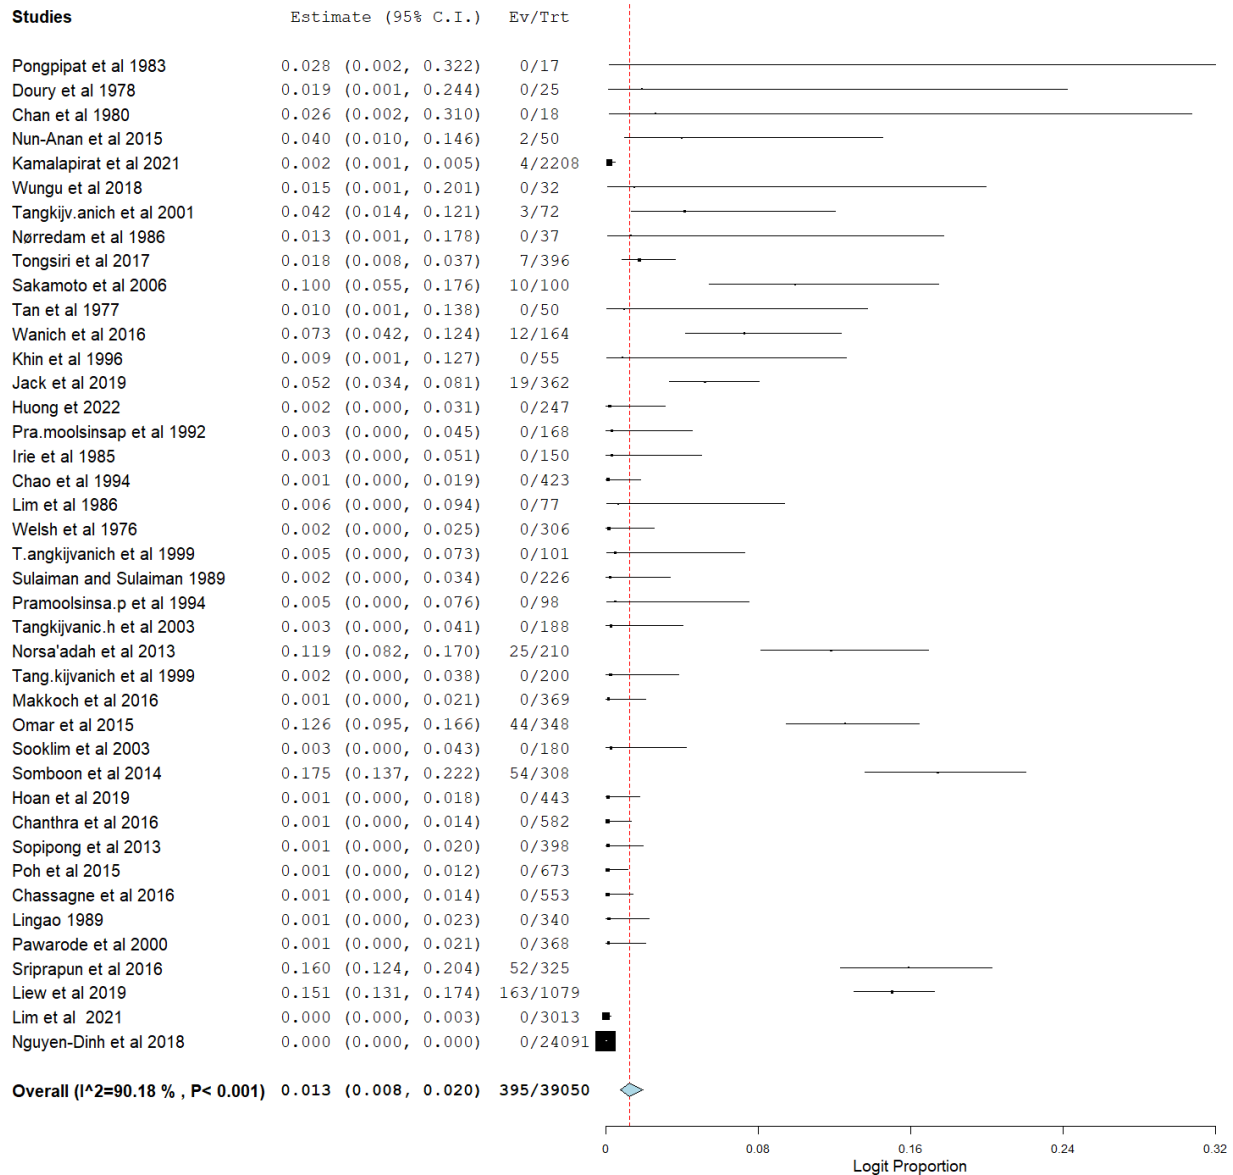



## AFP YES

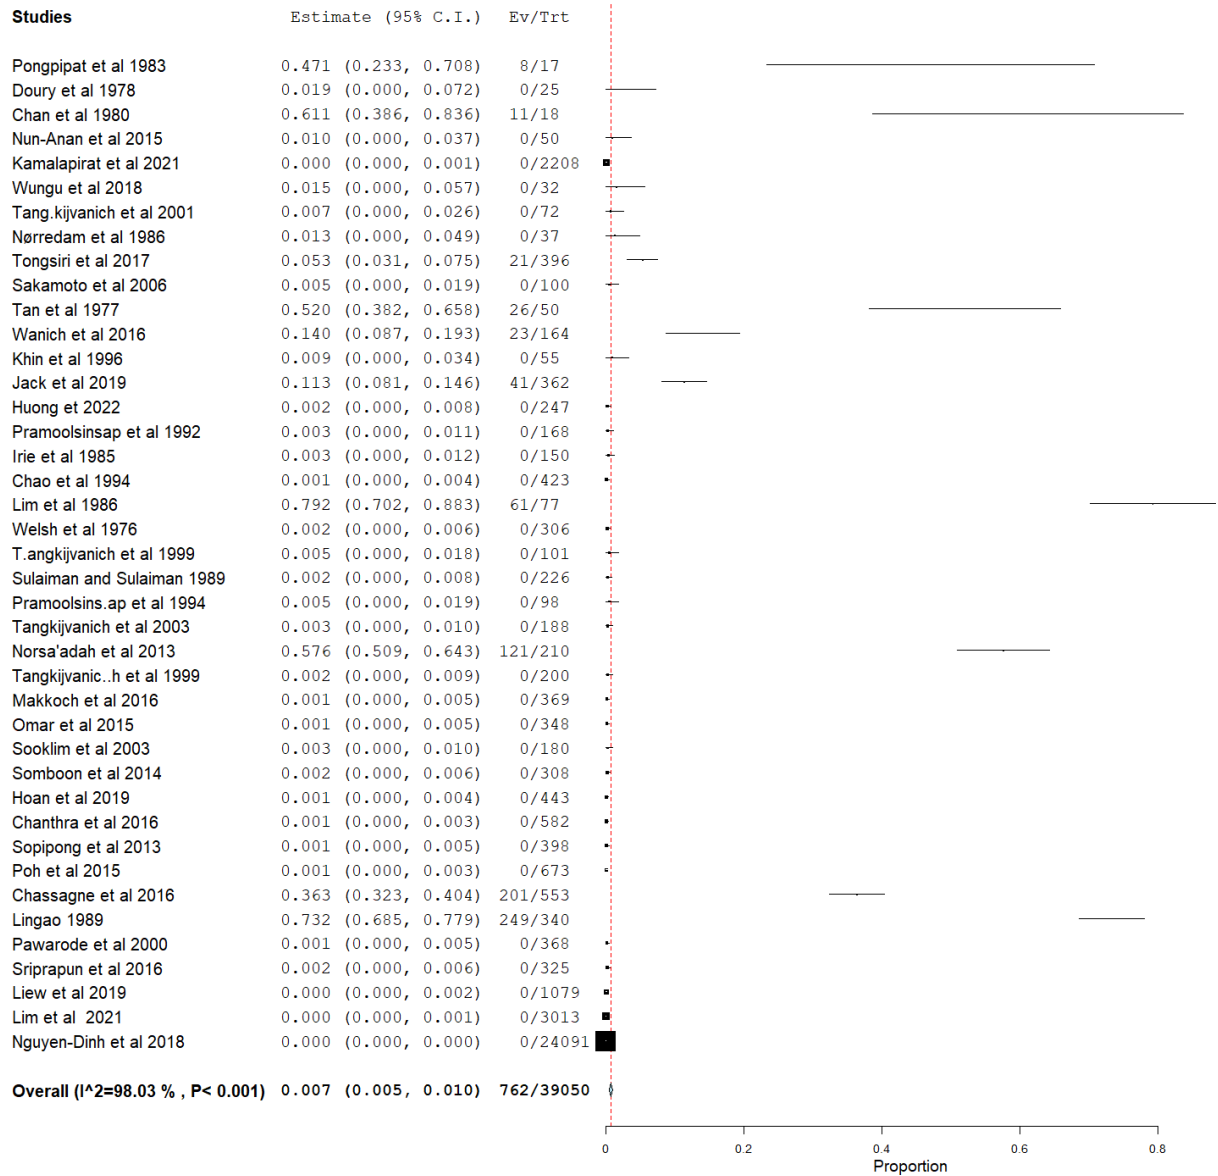

## AFP NO

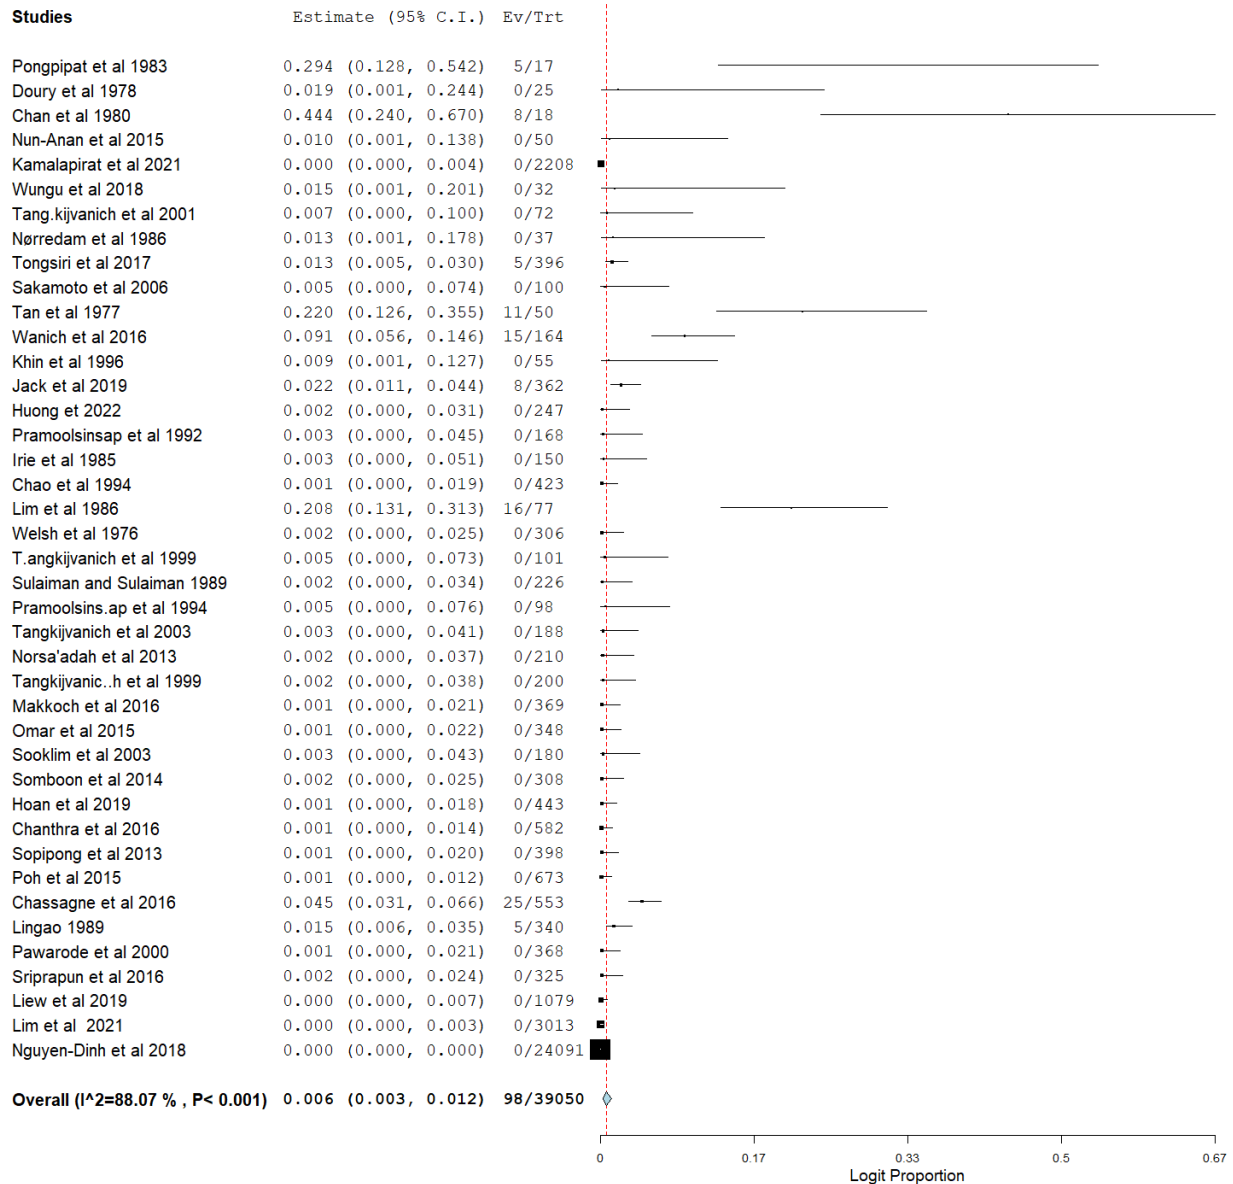

## CIRRHOSIS YES

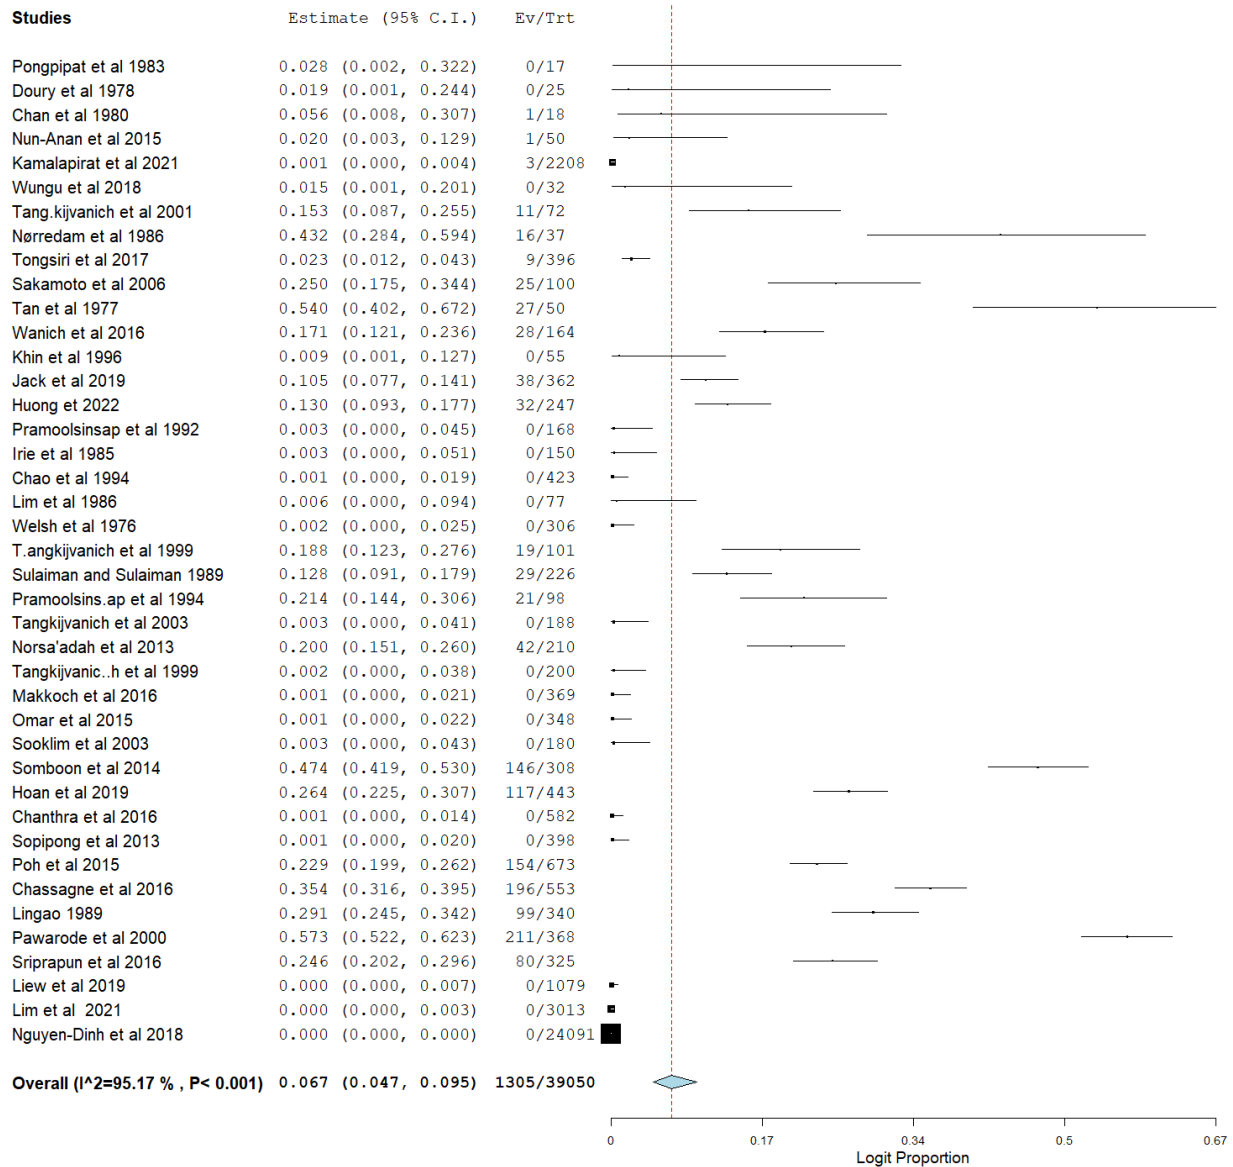

## CIRRHOSIS NO

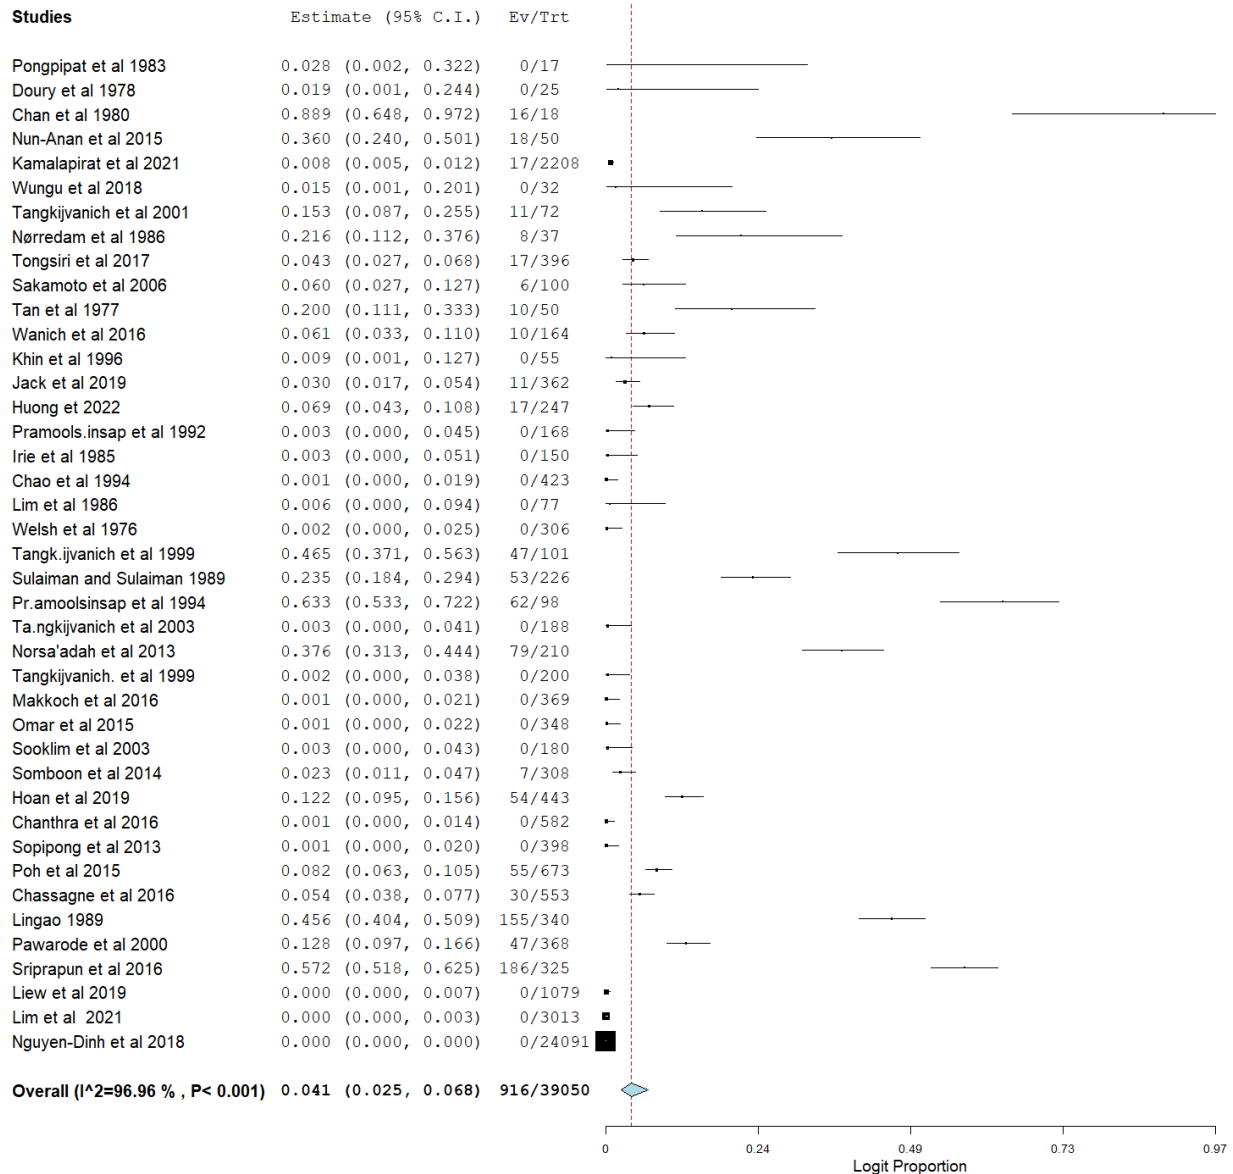

## STUDY DESIGN

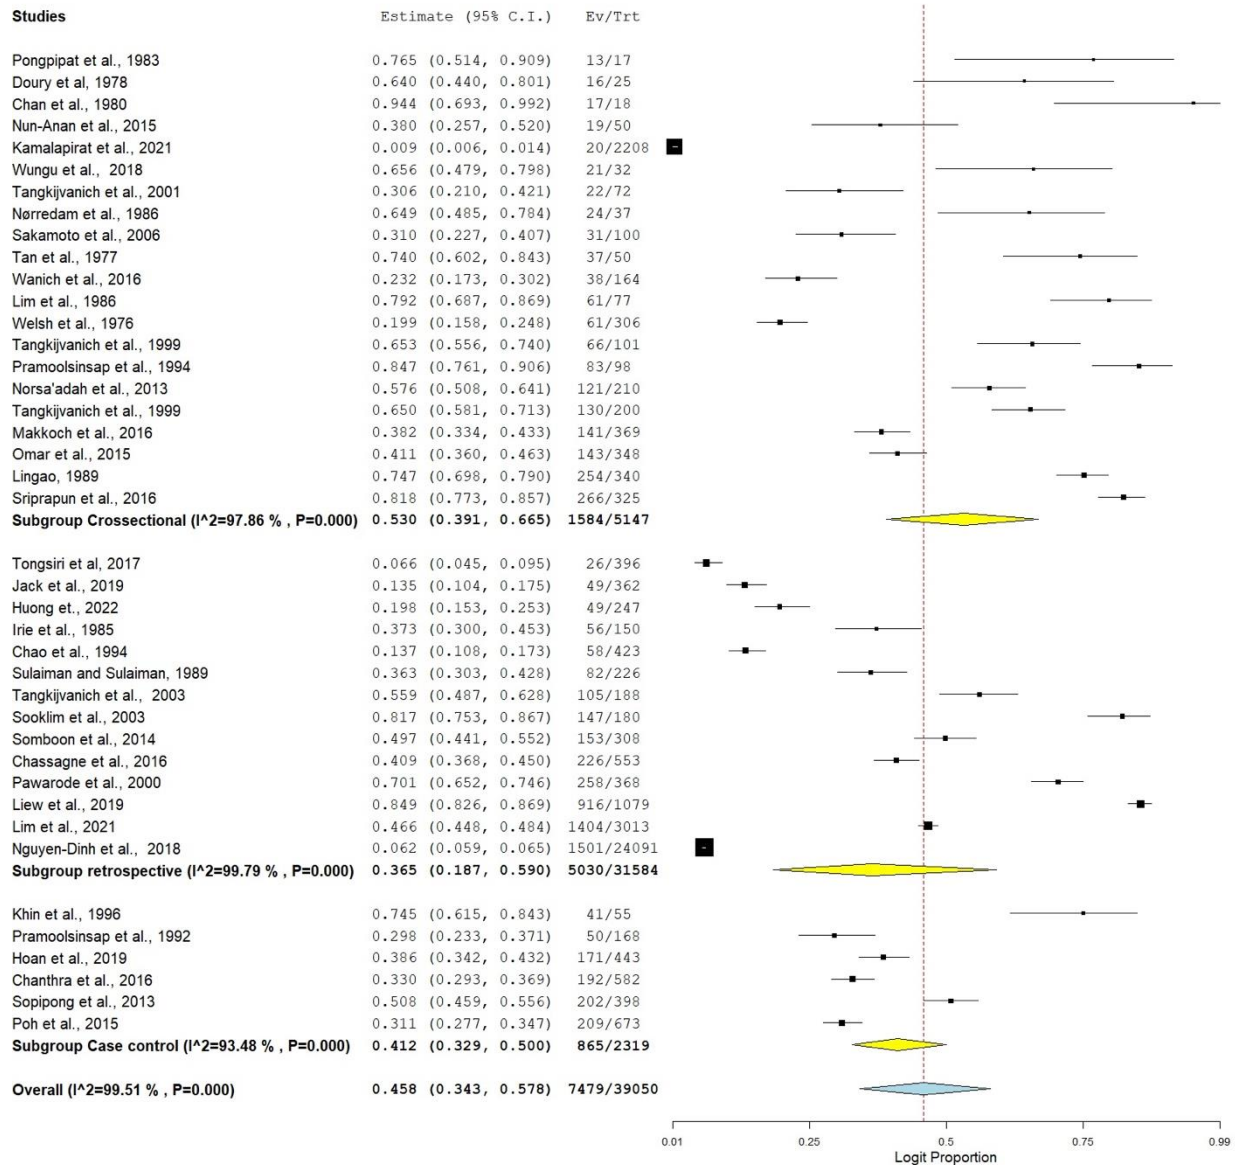

## YEAR OF STUDY

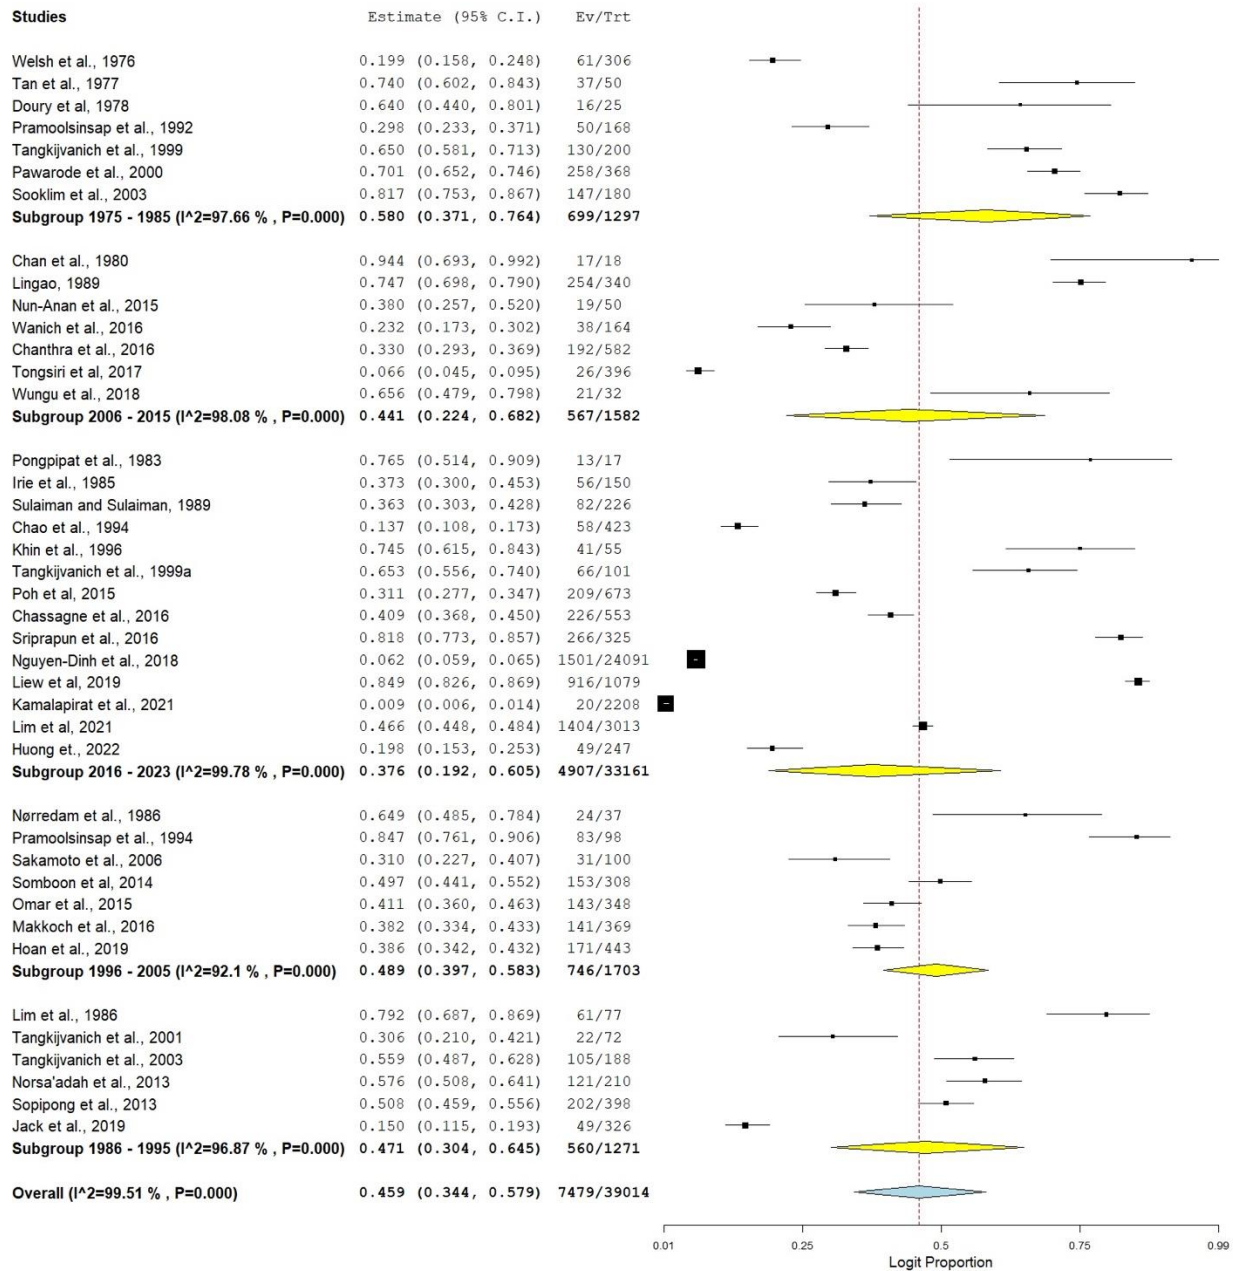

Supplement: s1 [file s1]
