# Supplementary material for: Prevalence of Hepatocellular Carcinoma in Hepatitis B Population within Southeast Asia: A Systematic Review and Meta-Analysis of 39,050 Participants
Source: MDPI journal article supplement (doi:10.3390/pathogens12101220), 2023-10-06
Supplement: s1 [file s1]

## SEARCH STRATEGY

### SCOPUS

((((TITLE-ABS-KEY(hepatocellular carcinoma)) OR (TITLE-ABS-KEY(HCC))) OR (TITLE-ABS-KEY(hepatocyte carcinoma)) OR (TITLE-ABS-KEY(liver cancer))) AND ((TITLE-ABS-KEY(hepatitis C)) OR (TITLE-ABS-KEY(hepatitis C virus))) AND (((TITLE-ABS-KEY(Brunei)) OR (TITLE-ABS-KEY(Cambodia)) OR (TITLE-ABS-KEY(Indonesia)) OR (TITLE-ABS-KEY(Laos))) OR ((TITLE-ABS-KEY(Brunei)) OR (TITLE-ABS-KEY(Cambodia)) OR (TITLE-ABS-KEY(Indonesia))) OR ((TITLE-ABS-KEY(Laos)) OR (TITLE-ABS-KEY(Malaysia)) OR (TITLE-ABS-KEY(Myanmar)) OR (TITLE-ABS-KEY(Burma))) OR ((TITLE-ABS-KEY(Philippines)) OR (TITLE-ABS-KEY(Singapore)) OR (TITLE-ABS-KEY(Thailand)) OR (TITLE-ABS-KEY(Timor-Leste)) OR (TITLE-ABS-KEY(East Timor)) OR (TITLE-ABS-KEY(Vietnam)) OR (TITLE-ABS-KEY("Timor leste")))).

### HCC PUBMED

("brunei"[MeSH Terms] OR "brunei"[All Fields] OR ("cambodia"[MeSH Terms] OR "cambodia"[All Fields] OR "cambodia s"[All Fields]) OR ("indonesia"[MeSH Terms] OR "indonesia"[All Fields] OR "indonesia s"[All Fields] OR "indonesias"[All Fields]) OR ("brunei"[MeSH Terms] OR "brunei"[All Fields]) OR ("laos"[MeSH Terms] OR "laos"[All Fields]) OR ("malaysia"[MeSH Terms] OR "malaysia"[All Fields] OR "malaysia s"[All Fields]) OR ("myanmar"[MeSH Terms] OR "myanmar"[All Fields] OR "myanmar s"[All Fields] OR "myanmars"[All Fields]) OR ("burma s"[All Fields] OR "myanmar"[MeSH Terms] OR "myanmar"[All Fields] OR "burma"[All Fields]) OR ("philippine"[All Fields] OR "philippines"[MeSH Terms] OR "philippines"[All Fields]) OR ("singapore"[MeSH Terms] OR "singapore"[All Fields] OR "singapore s"[All Fields]) OR ("thailand"[MeSH Terms] OR "thailand"[All Fields] OR "thailand s"[All Fields]) OR ("Timor leste"[MeSH Terms] OR "Timor leste"[All Fields] OR ("timor"[All Fields] AND "leste"[All Fields]) OR "Timor leste"[All Fields]) OR ("Timor leste"[MeSH Terms] OR "Timor leste"[All Fields] OR ("east"[All Fields] AND "timor"[All Fields]) OR "east timor"[All Fields]) OR ("vietnam"[MeSH Terms] OR "vietnam"[All

Fields] OR "vietnam s"[All Fields]) OR "Timor leste"[All Fields]) AND ("hepatocellular carcinoma"[All Fields] OR ("liver neoplasms"[MeSH Terms] OR ("liver"[All Fields] AND "neoplasms"[All Fields]) OR "liver neoplasms"[All Fields] OR ("liver"[All Fields] AND "cancer"[All Fields]) OR "liver cancer"[All Fields]) OR "HCC"[All Fields]).

## **GOOGLE SCHOLAR**

allintitle: Hepatocellular carcinoma AND hepatitis B AND Malaysia OR Singapore OR Thailand OR Cambodia OR Indonesia OR Myanmar OR Brunei OR East Timor OR Laos OR Vietnam OR Philippines "hepatocellular carcinoma" "Hepatitis B"

## **SCIENCE DIRECT**

(Hepatocellular carcinoma OR liver cancer OR HCC) AND (Hepatitis B OR HBV) AND (Malaysia OR Singapore OR Thailand OR Cambodia OR Indonesia OR Myanmar OR Brunei OR East Timor OR Laos OR Vietnam OR Philippines)
