# Supplementary material for: Prevalence of Hepatocellular Carcinoma in Hepatitis B Population within Southeast Asia: A Systematic Review and Meta-Analysis of 39,050 Participants
Source: MDPI journal article supplement (doi:10.3390/pathogens12101220), 2023-10-06
Supplement: s1 [file s1]

**QUALITY OF INCLUDED STUDIES BY JBI CRITICAL APPRAISAL CHECKLIST FOR STUDIES  
REPORTING PREVALENCE DATA**

| S/N | Name of authors and year of publication |      | JBI checklist* |     |     |     |     |     |     |     |     | Total |
|-----|-----------------------------------------|------|----------------|-----|-----|-----|-----|-----|-----|-----|-----|-------|
| 1   | Welsh et al., 1976                      | 1976 | 1              | 2   | 3   | 4   | 5   | 6   | 7   | 8   | 9   |       |
| 2   | Tan et al., 1977                        | 1977 | Yes            | No  | Yes | 16    |
| 3   | Doury et al, 1978                       | 1978 | Yes            | No  | Yes | 16    |
| 4   | Chan et al., 1980                       | 1980 | Yes            | No  | Yes | 16    |
| 5   | Pongpipat et al., 1983                  | 1983 | Yes            | No  | Yes | 16    |
| 6   | Irie et al., 1985                       | 1985 | Yes            | No  | Yes | 16    |
| 7   | Nørredam et al., 1986                   | 1986 | Yes            | No  | Yes | 16    |
| 8   | Lim et al., 1986                        | 1986 | Yes            | No  | Yes | 16    |
| 9   | Sulaiman and Sulaiman, 1989             | 1989 | Yes            | No  | Yes | 16    |
| 10  | Lingao, 1989                            | 1989 | Yes            | No  | Yes | 16    |
| 11  | Pramoolsinsap et al., 1992              | 1992 | Yes            | No  | Yes | 16    |
| 12  | Chao et al., 1994                       | 1994 | Yes            | No  | Yes | 16    |
| 13  | Pramoolsinsap et al., 1994              | 1994 | Yes            | No  | Yes | 16    |
| 14  | Khin et al., 1996                       | 1996 | Yes            | No  | Yes | 16    |
| 15  | Tangkijvanich et al., 1999a             | 1999 | Yes            | No  | Yes | 16    |
| 16  | Tangkijvanich et al., 1999              | 1999 | Yes            | No  | Yes | 16    |
| 17  | Pawarode et al., 2000                   | 2000 | Yes            | No  | Yes | 16    |
| 18  | Tangkijvanich et al., 2001              | 2001 | Yes            | No  | Yes | 16    |
| 19  | Tangkijvanich et al., 2003              | 2003 | Yes            | No  | Yes | 16    |
| 20  | Sooklim et al., 2003                    | 2003 | Yes            | No  | Yes | 16    |
| 21  | Sakamoto et al., 2006                   | 2006 | Yes            | No  | Yes | 16    |
| 22  | Norsa'adah et al., 2013                 | 2013 | Yes            | No  | Yes | 16    |
| 23  | Sopipong et al., 2013                   | 2013 | Yes            | No  | Yes | 16    |
| 24  | Somboon et al, 2014                     | 2014 | Yes            | No  | Yes | 16    |
| 25  | Nun-Anan et al., 2015                   | 2015 | Yes            | No  | Yes | 16    |
| 26  | Omar et al., 2015                       | 2015 | Yes            | No  | Yes | 16    |
| 27  | Poh et al, 2015                         | 2015 | Yes            | Yes | Yes | Yes | Yes | Yes | Yes | Yes | Yes | 18    |
| 28  | Wanich et al., 2016                     | 2016 | Yes            | Yes | Yes | Yes | Yes | Yes | Yes | Yes | Yes | 18    |
| 29  | Makkoch et al., 2016                    | 2016 | Yes            | No  | Yes | 16    |
| 30  | Chanthra et al., 2016                   | 2016 | Yes            | No  | Yes | 16    |
| 31  | Chassagne et al., 2016                  | 2016 | Yes            | No  | Yes | 16    |
| 32  | Sriprapun et al., 2016                  | 2016 | Yes            | No  | Yes | 16    |
| 33  | Tongsiri et al, 2017                    | 2017 | Yes            | No  | Yes | 16    |
| 34  | Wungu et al., 2018                      | 2018 | Yes            | No  | Yes | 16    |
| 35  | Nguyen-Dinh et al., 2018                | 2018 | Yes            | No  | Yes | 16    |
| 36  | Jack et al., 2019                       | 2019 | Yes            | No  | Yes | 16    |
| 37  | Hoan et al., 2019                       | 2019 | Yes            | Yes | Yes | Yes | Yes | Yes | Yes | Yes | Yes | 18    |
| 38  | Liew et al, 2019                        | 2019 | Yes            | No  | Yes | 16    |
| 39  | Kamalpirat et al., 2021                 | 2021 | Yes            | Yes | Yes | Yes | Yes | Yes | Yes | Yes | Yes | 18    |
| 40  | Lim et al, 2021                         | 2021 | Yes            | No  | Yes | 16    |
| 41  | Huong et., 2022                         | 2022 | Yes            | Yes | Yes | Yes | Yes | Yes | Yes | Yes | Yes | 18    |

**JBI CHECKLIST\*** 1. Appropriate sampling frame to address target population, 2. Appropriate sampling way of study participants, 3. Adequate sample size, 4. Detail description of study participants and settings, 5. Data analysis with sufficient coverage of identified sample, 6. Use of valid methods to identify the condition, 7. Standard, reliable way of measurement of condition for all participants, 8. Availability of appropriate statistical analysis, 9. Adequate response rate and management of low response rate.

**Scores are coded as Yes=2 and No=0.**
